# Supplementary material for: Capping agent promoted oxidation of gold nanoparticles: cetyl trimethylammonium bromide
Source: Royal Society of Chemistry journal article supplement (doi:10.1039/c5cp05146k), 2015-01-01
Supplement: c5cp05146k1.pdf [file c5cp05146k1.pdf]

## Electronic Supplementary Information

# Capping agent promoted oxidation of gold nanoparticles: Cetyl trimethylammonium bromide

*Blake J. Plowman,<sup>a</sup> Kristina Tschulik,<sup>a\*</sup> Neil P. Young<sup>b</sup> and Richard G. Compton<sup>a\*</sup>*

<sup>a</sup> Department of Chemistry, Physical and Theoretical Chemistry Laboratory, University of Oxford, South Parks Road, Oxford, OX13QZ, United Kingdom.

<sup>b</sup> Department of Materials, University of Oxford, Parks Road, Oxford, OX13PH, United Kingdom.

\*Corresponding authors: Department of Chemistry, PTCL, University of Oxford, South Parks Road, Oxford, OX13QZ, United Kingdom, Tel: 00441865 275957, E-mail: [tschulik.kristina@gmail.com](mailto:tschulik.kristina@gmail.com), [kristina.tschulik@ruhr-uni-bochum.de](mailto:kristina.tschulik@ruhr-uni-bochum.de), [richard.compton@chem.ox.ac.uk](mailto:richard.compton@chem.ox.ac.uk).

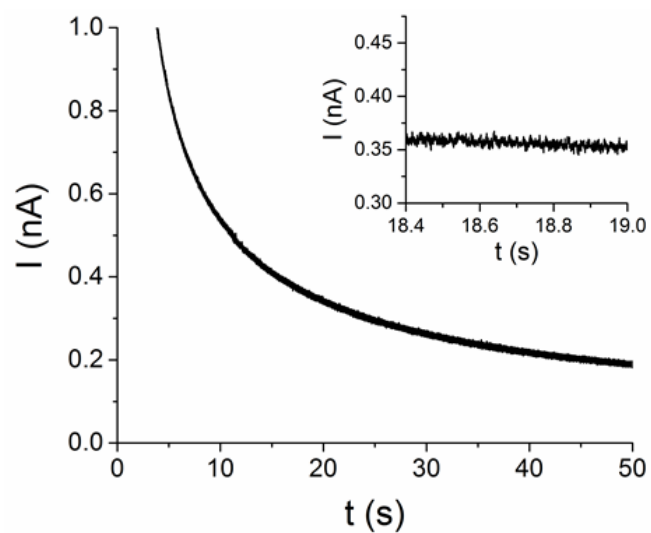

**Figure S1.** Chronoamperogram recorded at 0.7 V vs MSE using a carbon microcylinder electrode immersed in a solution of 0.1 M  $\text{HNO}_3$ .

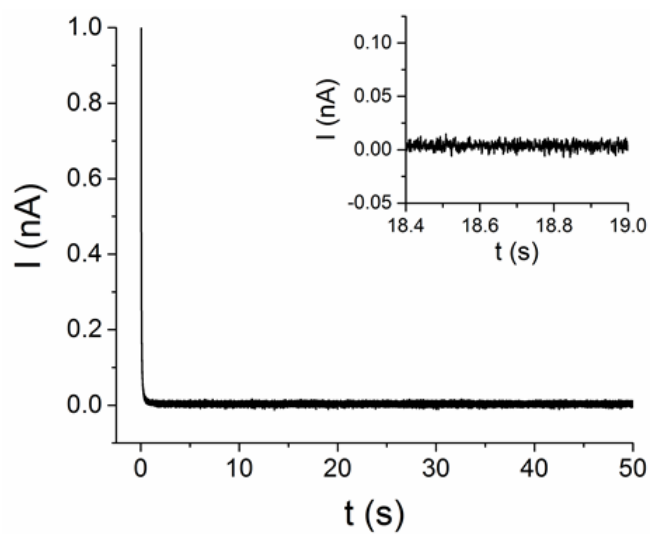

**Figure S2.** Chronoamperogram recorded at 0.4 V vs MSE using a carbon microcylinder electrode immersed in a solution of 0.1 M  $\text{HNO}_3$  with 1 pM CTAB-capped gold nanoparticles.

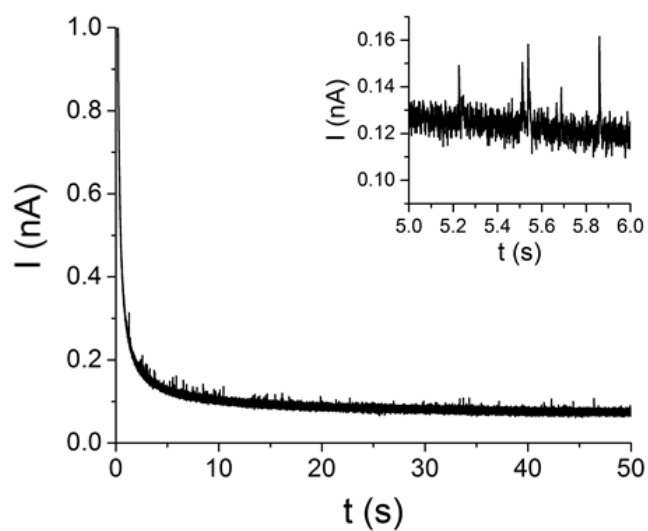

**Figure S3.** Chronoamperogram recorded at 0.7 V vs MSE using a carbon microcylinder electrode immersed in a solution of 0.1 M  $\text{HNO}_3$  with 1 pM CTAB-capped gold nanoparticles.

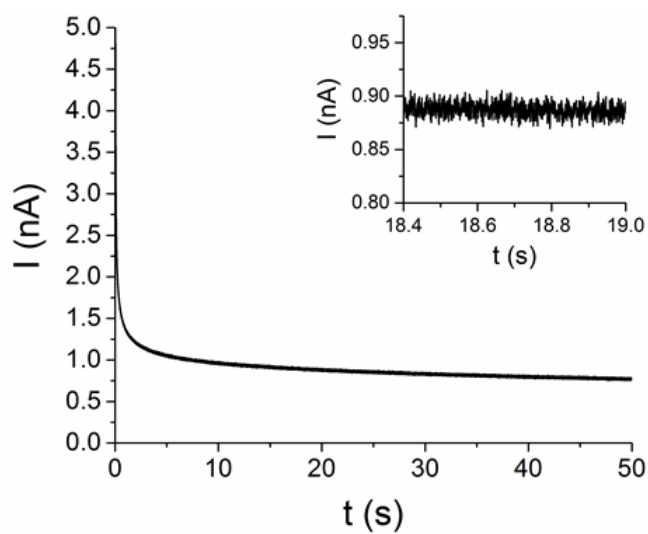

**Figure S4.** Chronoamperogram recorded at 0.7 V vs MSE using a carbon microcylinder electrode immersed in a solution of 0.1 M  $\text{HNO}_3$  with 0.15 mM CTAB.
